# Supplementary material for: Environmental Identities and Attitude towards Crude Oil Pipeline Vandalism in Niger Delta Oil-Producing Communities
Source: MDPI journal article supplement (doi:10.3390/su15065610), 2023-03-22
Supplement: s1 [file s1]

Archive with 1 entries (1 files):
- sustainability-2197848-supplementary.pdf
